# Supplementary material
Source: PubMed Central journal article supplement (PMC4937825)

**Figure S1.**

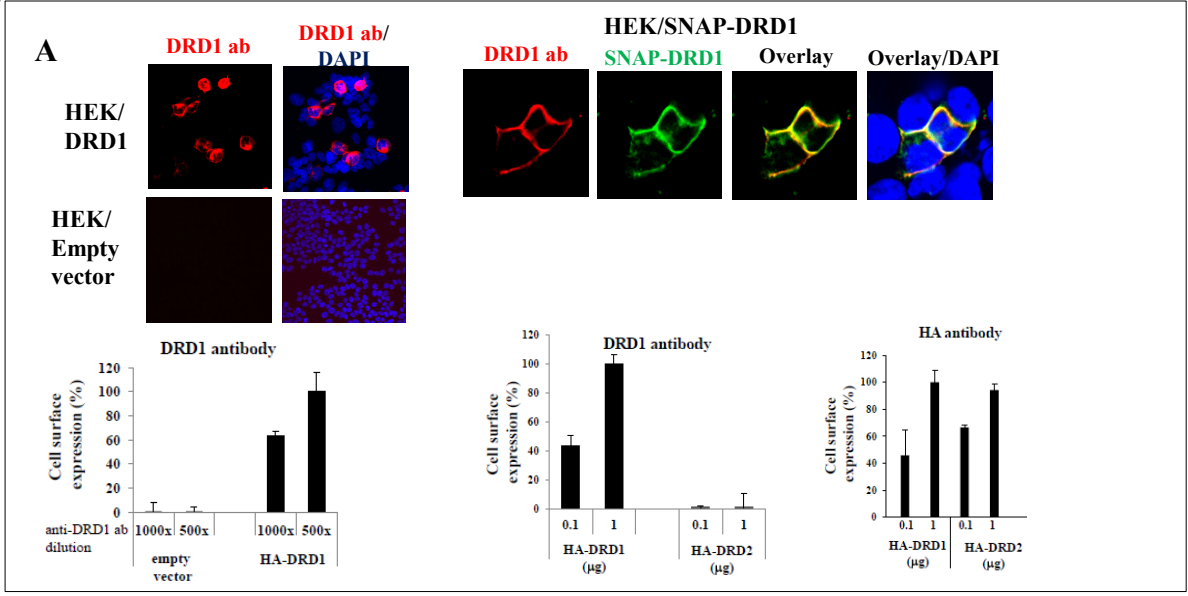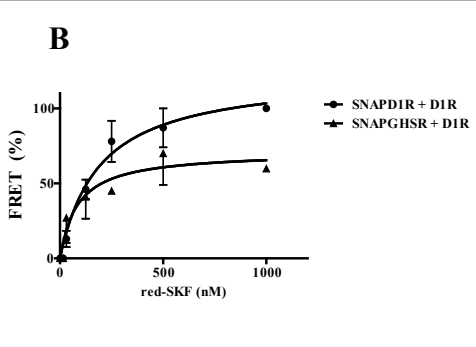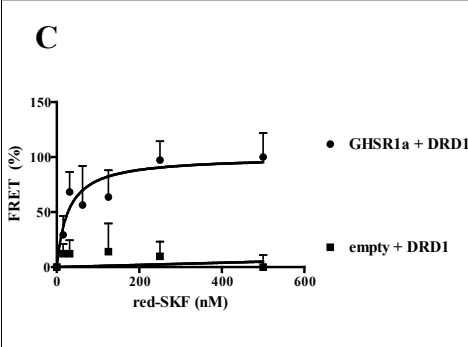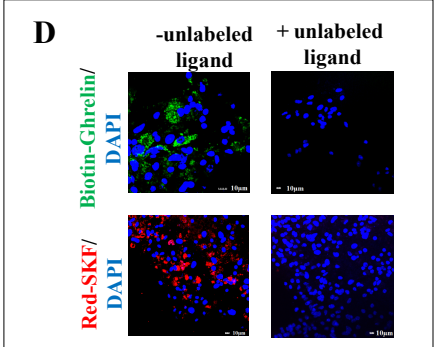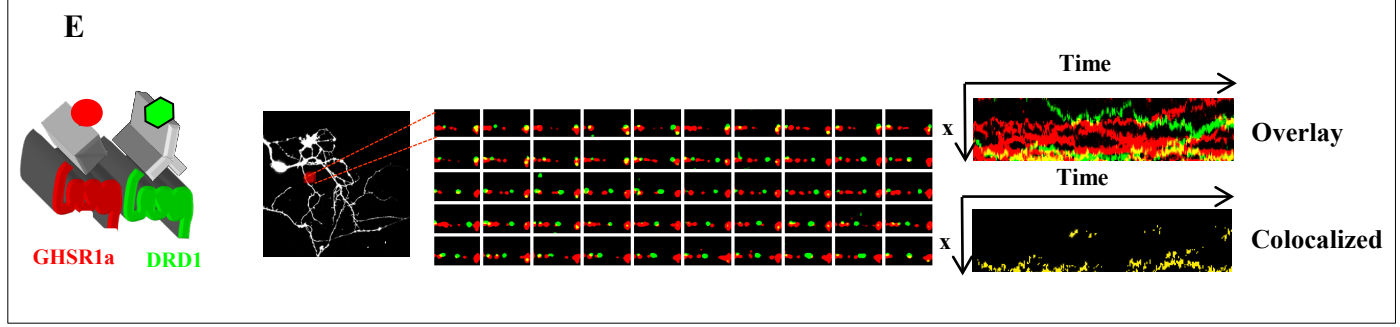

Supplement: NIHMS736486-supplement-1.pdf [file NIHMS736486-supplement-1.pdf]

# Figure S2.

A

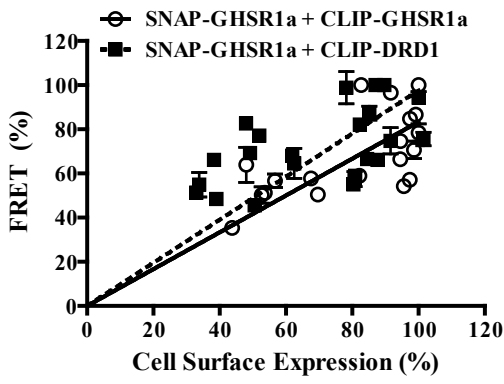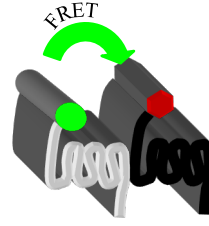

B

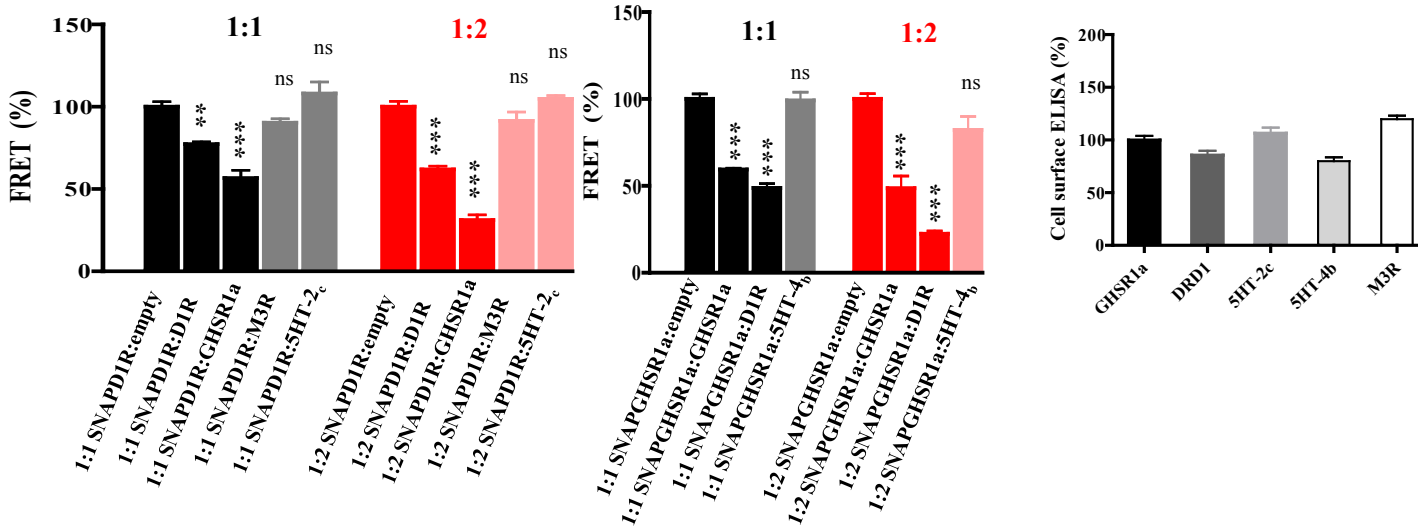

C

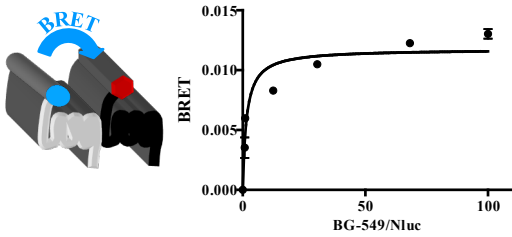

D

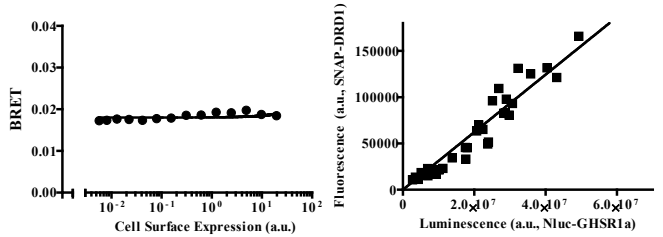

E

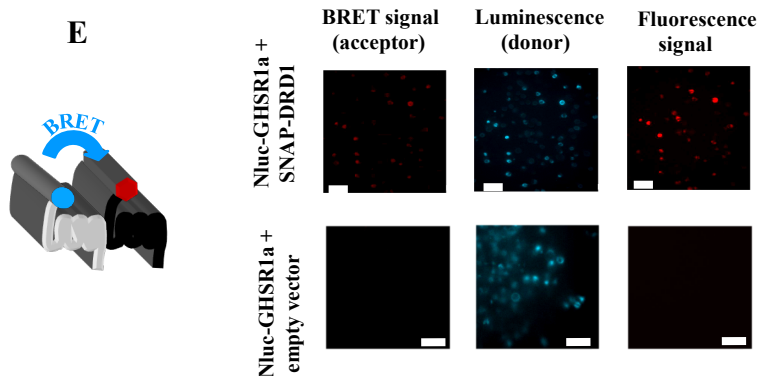

Supplement: NIHMS736486-supplement-2.pdf [file NIHMS736486-supplement-2.pdf]

**Figure S3.**

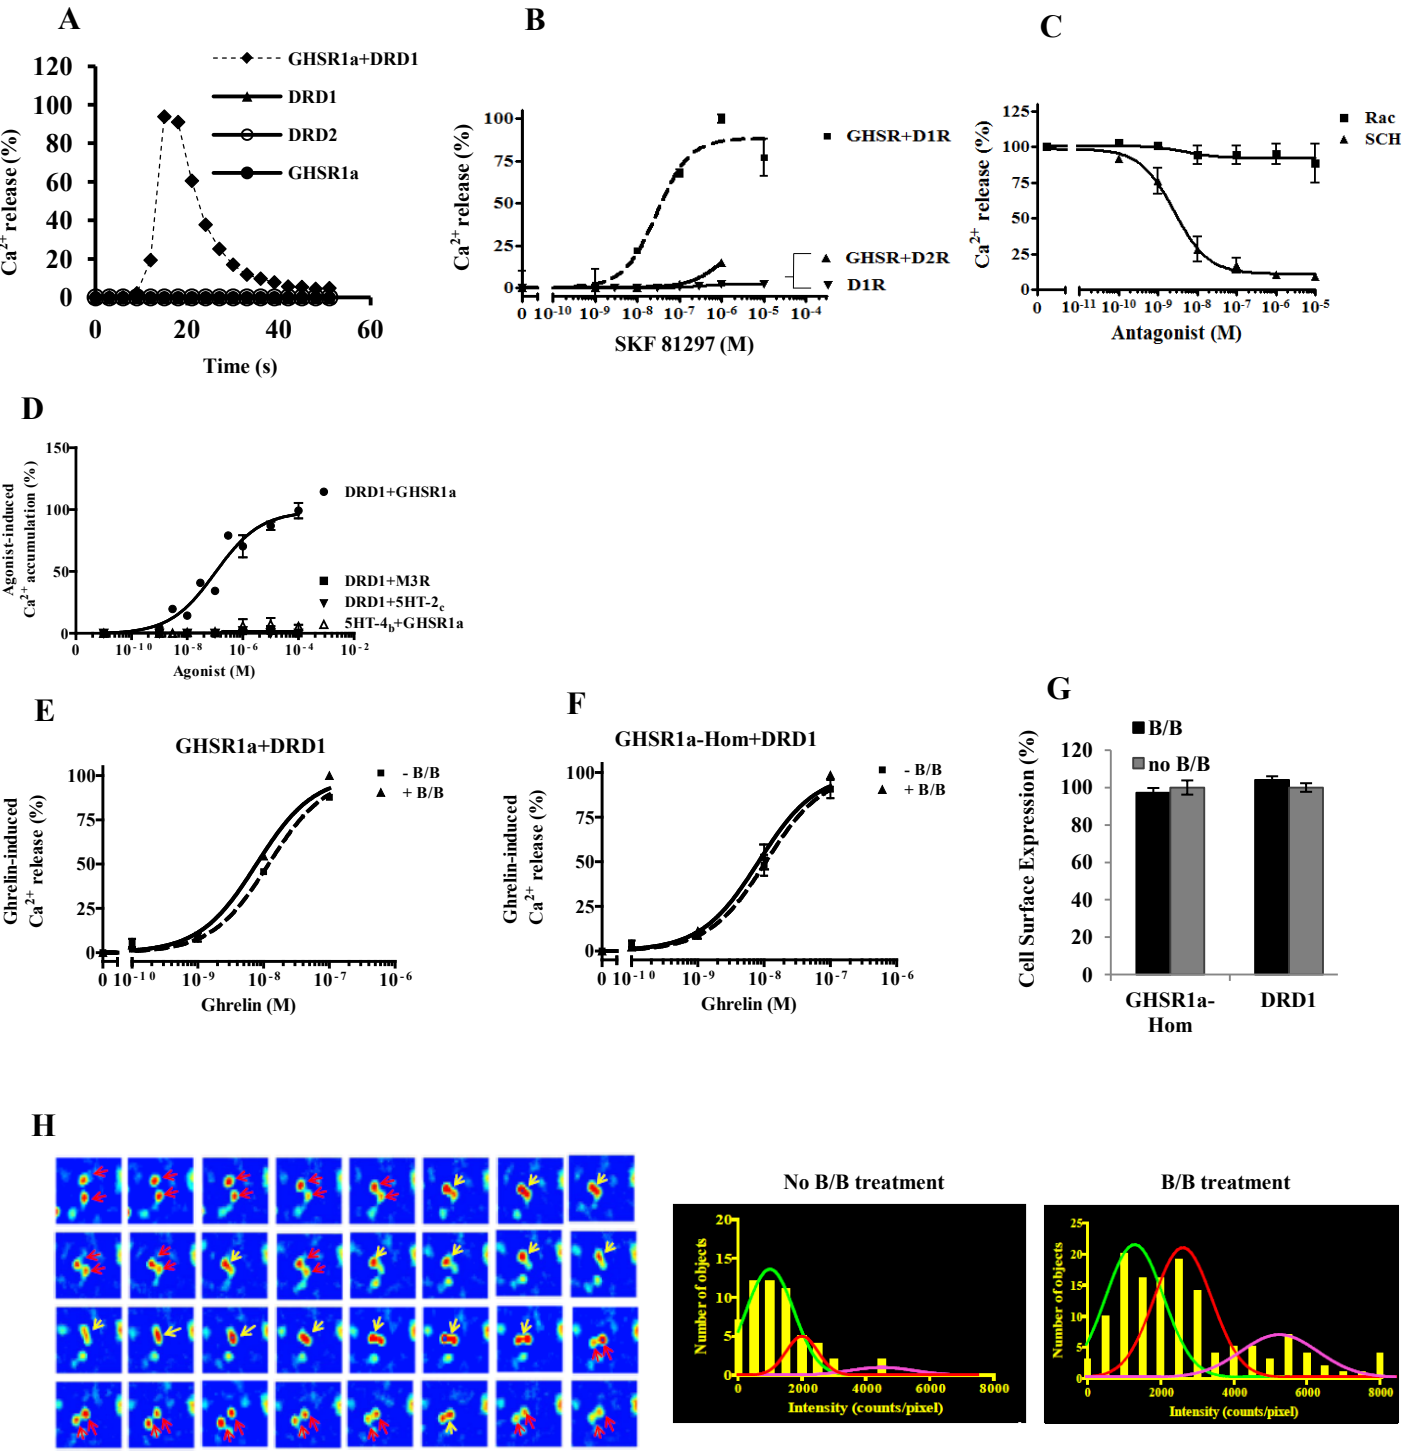

Supplement: NIHMS736486-supplement-3.pdf [file NIHMS736486-supplement-3.pdf]

# Figure S4.

**A**

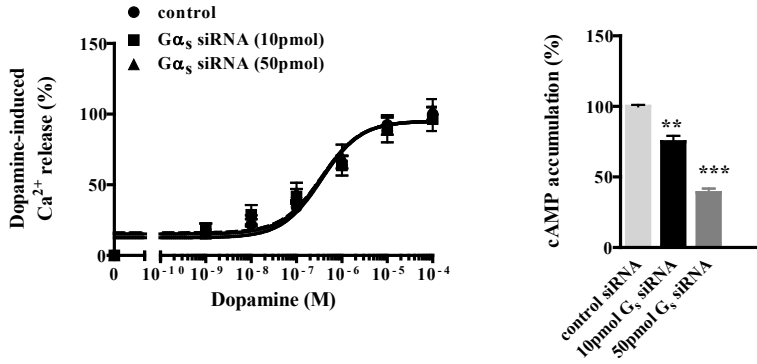

**B**

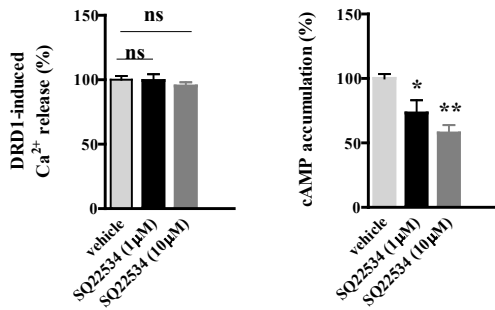

**C**

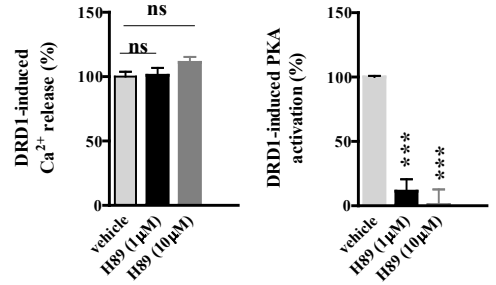

**D**

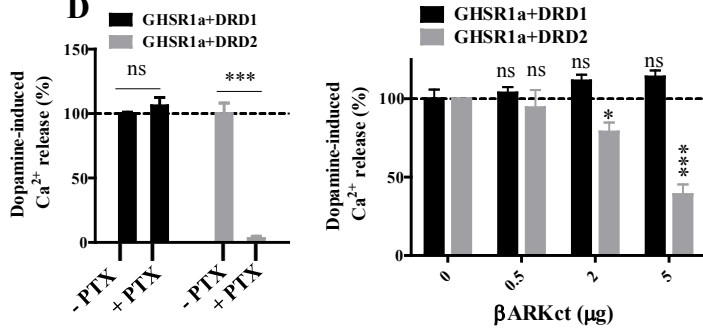

**E**

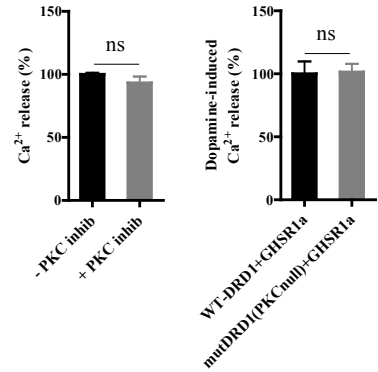

**F**

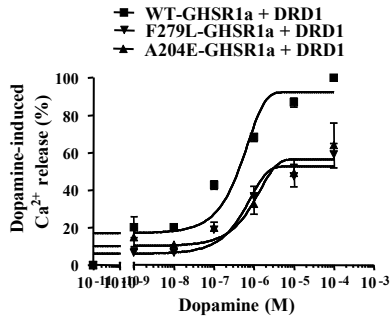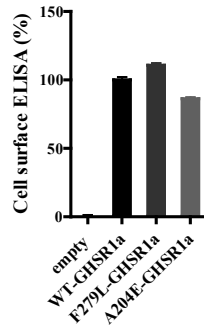

**G**

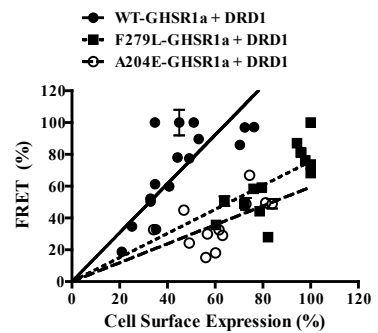

Supplement: NIHMS736486-supplement-4.pdf [file NIHMS736486-supplement-4.pdf]

**Figure S5.**

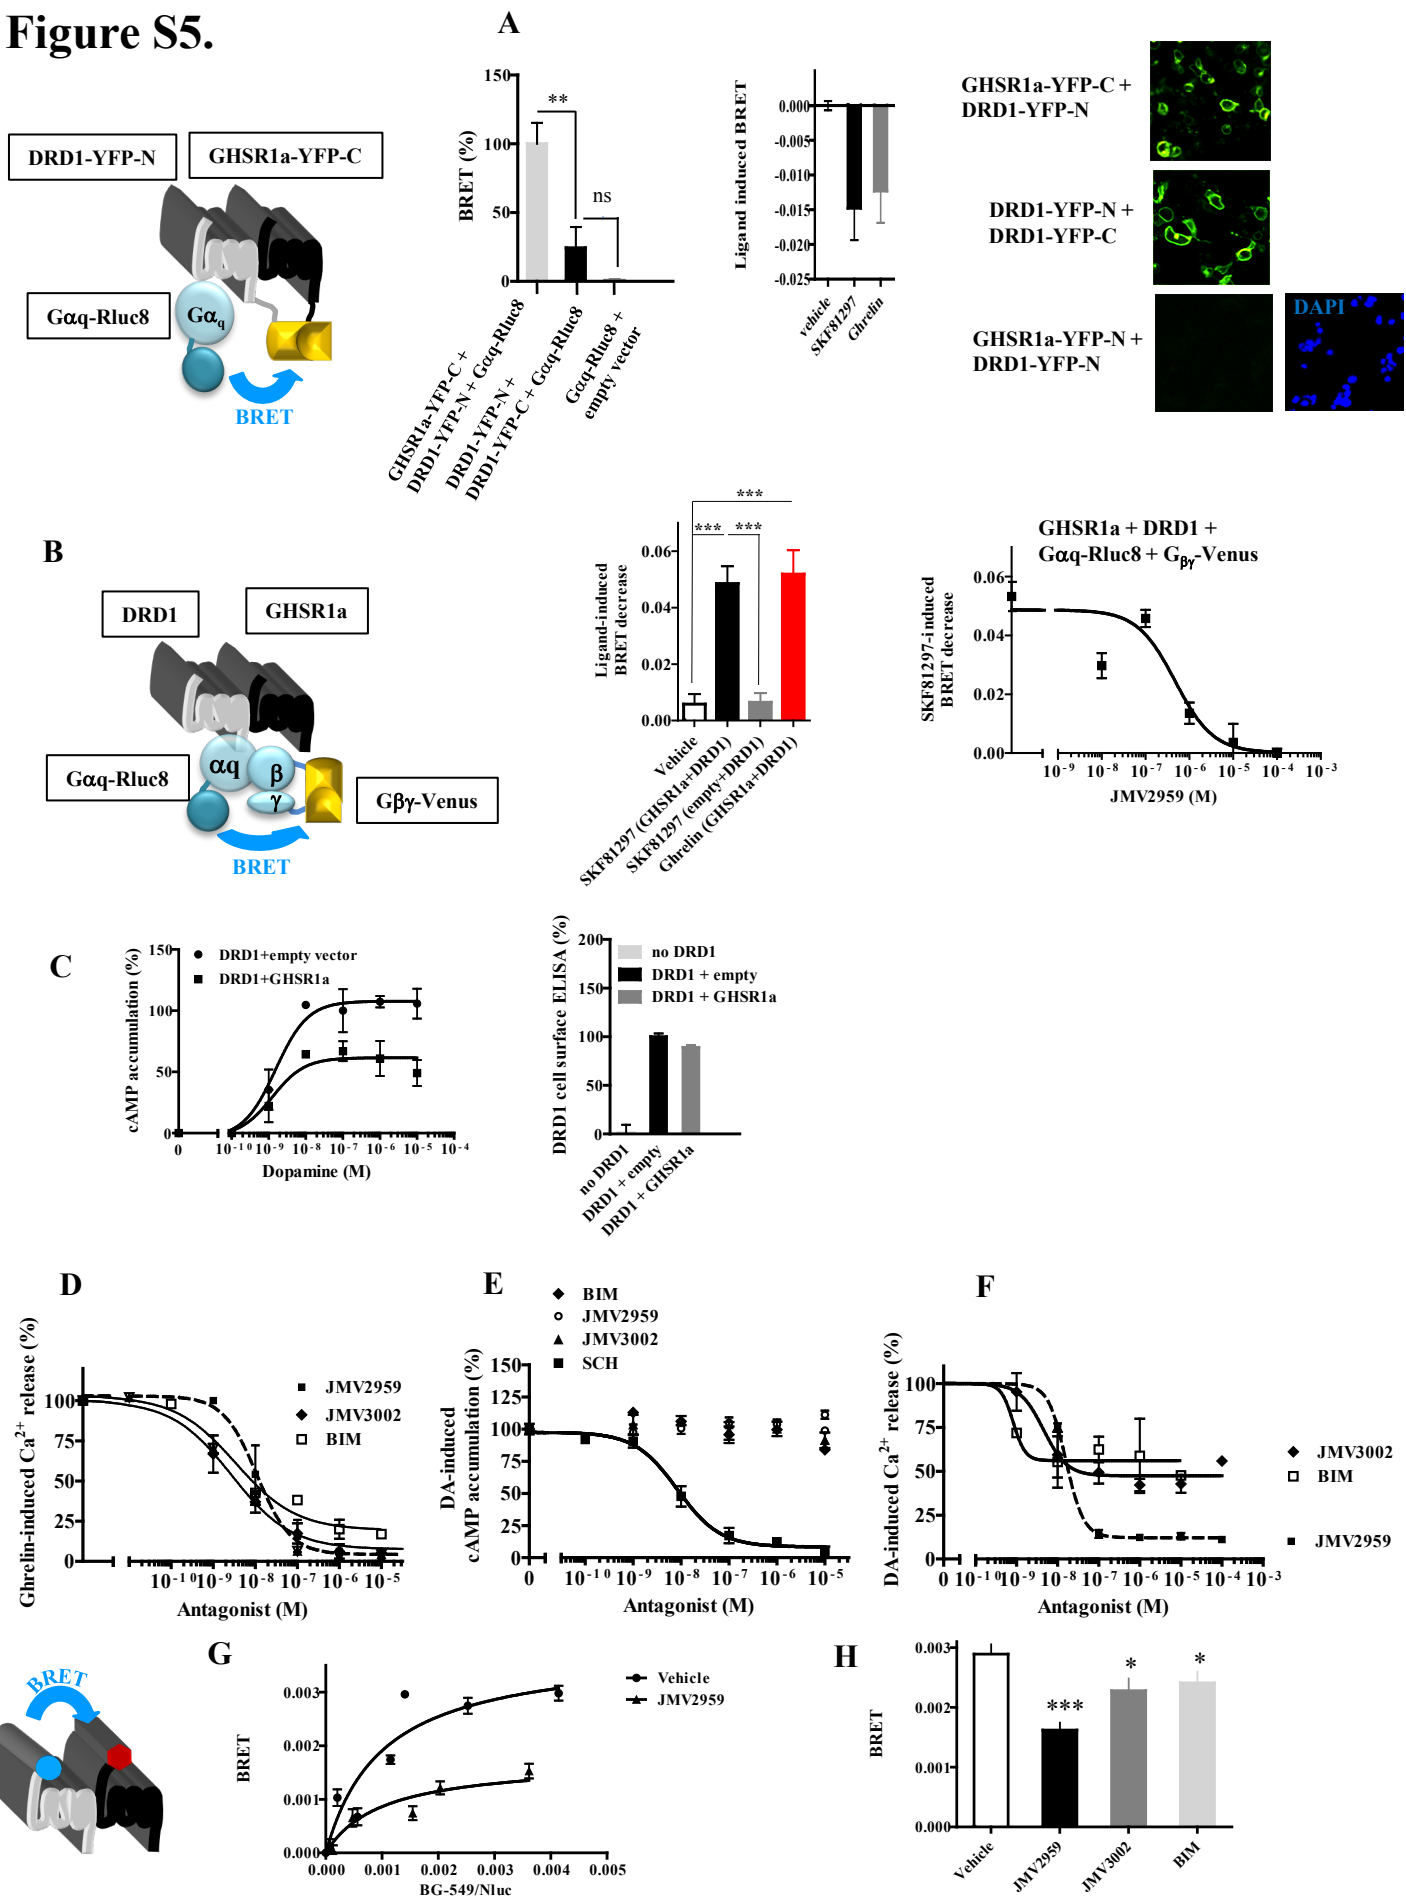

Supplement: NIHMS736486-supplement-5.pdf [file NIHMS736486-supplement-5.pdf]

# Figure S6.

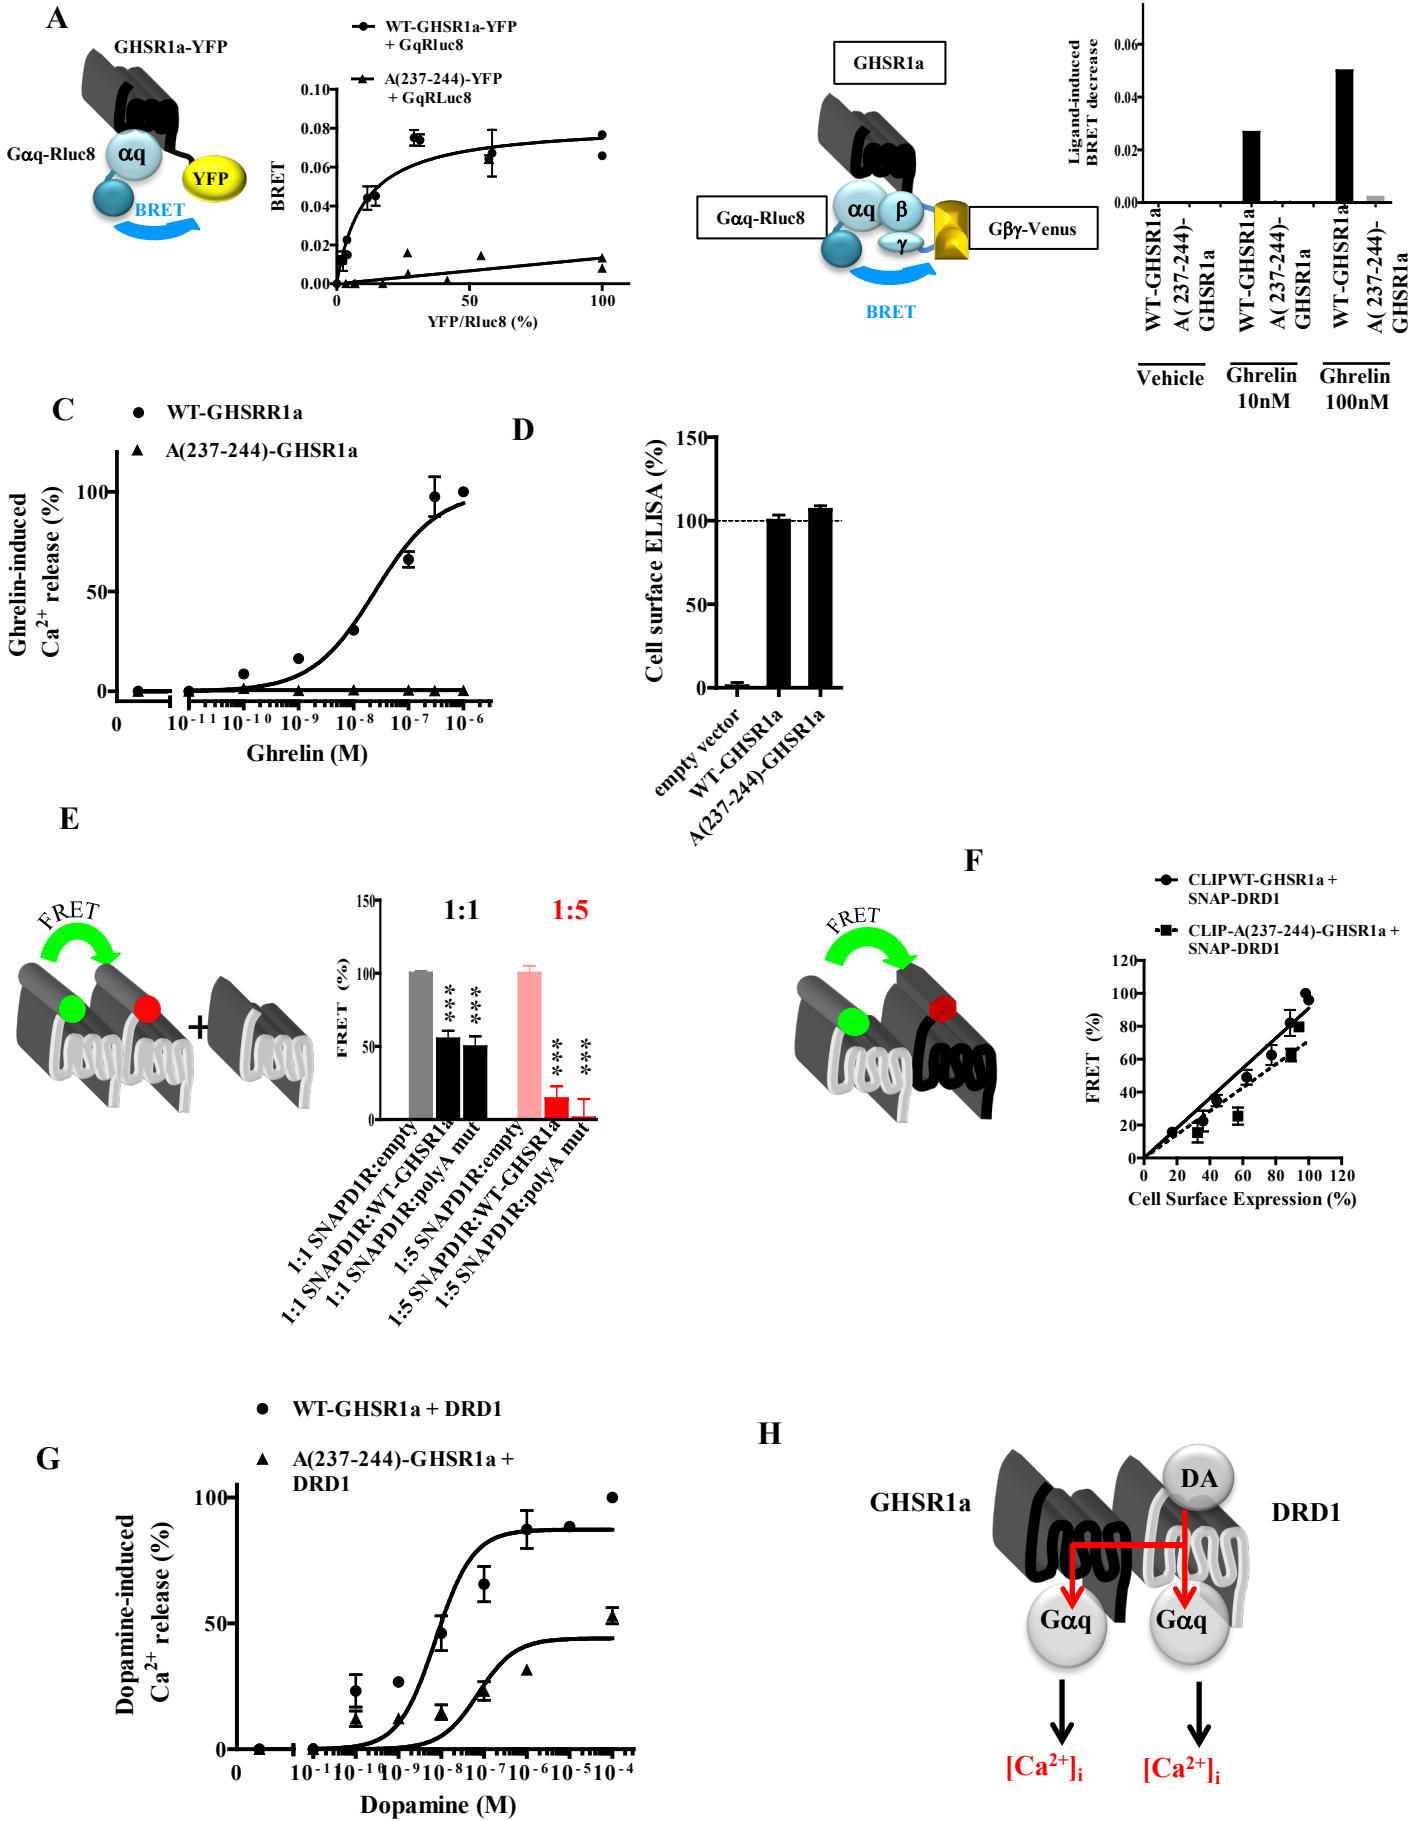

Supplement: NIHMS736486-supplement-6.pdf [file NIHMS736486-supplement-6.pdf]

# Figure S7.

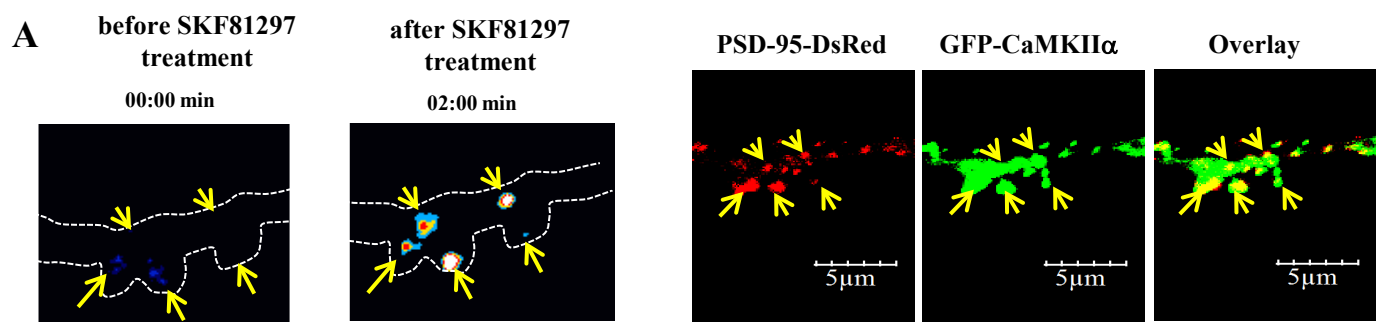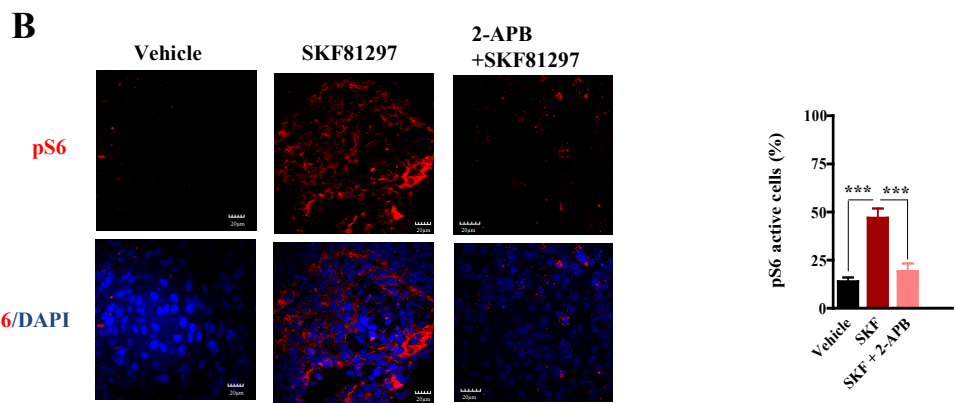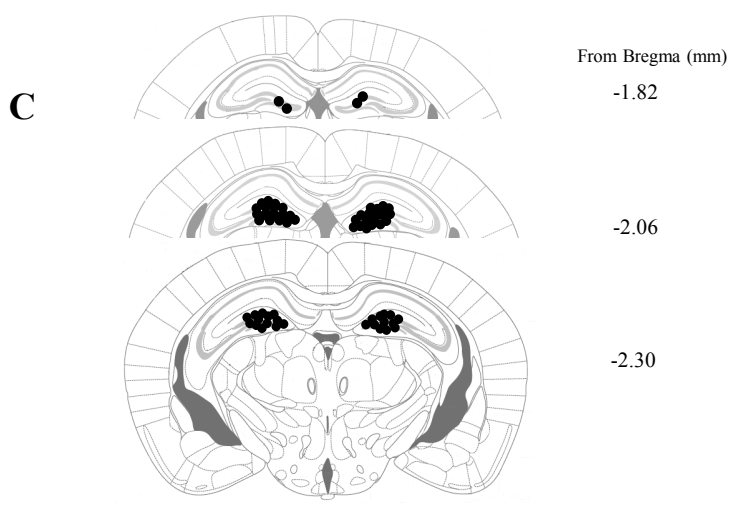

Supplement: NIHMS736486-supplement-7.pdf [file NIHMS736486-supplement-7.pdf]
